1 **TITLE:**

2 Association between body mass index (BMI) and hypertension in South Asian

3 population: Evidence from Demographic and Health Survey

4 **RUNNING TITLE:**

5 BMI and hypertension in South Asia

6 **AUTHORS:**

7 Fariha Binte Hossain<sup>1\*</sup>, Md Shajedur Rahman Shawon<sup>2\*</sup>, Gourab Adhikary<sup>1</sup>, Arif

8 Chowdhury<sup>3</sup>

9 <sup>1</sup> Independent Researcher

10 <sup>2</sup> Cancer Epidemiology Unit, Nuffield Department of Population Health, University of

11 Oxford, UK

12 <sup>3</sup> Department of Public Health, North South University, Dhaka, Bangladesh

13

14

15 **CORRESPONDING AUTHOR:**

16 Md Shajedur Rahman Shawon

17 Cancer Epidemiology Unit, Nuffield Department of Population Health

18 University of Oxford, Richard Doll Building, OX3 7LF, Oxford, UK

19 Email: [md.shawon@ndph.ox.ac.uk](mailto:md.shawon@ndph.ox.ac.uk); [dr.shajedur@gmail.com](mailto:dr.shajedur@gmail.com)

20

21

22 \* These authors contributed equally to this work

1 **ABSTRACT**

2 Although there has been a well-established association between adiposity and  
3 hypertension, whether such associations are heterogeneous for South Asian  
4 populations or for different socioeconomic groups is not well-known. We analysed  
5 the recent Demographic and Health Survey (DHS) data from Bangladesh, India, and  
6 Nepal to estimate the age-specific prevalence of hypertension and the association of  
7 body mass index (BMI) with hypertension. We used multiple logistic regressions to  
8 estimate the odds ratios (ORs) with 95% confidence intervals (CIs) of hypertension  
9 for overweight and obesity as well as for each 5-unit increase in BMI. The overall  
10 prevalence for hypertension among participants aged 35-44 years were 17.4%, 20%,  
11 and 22.5% for Bangladesh, India, and Nepal, respectively. For all age groups, men  
12 were more likely to be hypertensive than women in India and Nepal, but not in  
13 Bangladesh. Overweight and obesity were associated with higher odds of  
14 hypertension in all countries. For each 5 kg/m<sup>2</sup> increase in BMI, the ORs for  
15 hypertension were 1.79 (95% CI: 1.65-1.93), 1.59 (95% CI: 1.58-1.61), and 2.03  
16 (95% CI: 1.90-2.16) in Bangladesh, India, and Nepal, respectively. The associations  
17 between BMI and hypertension were consistent across various subgroups defined by  
18 sex, age, urbanicity, educational attainment and household's wealth index. Our study  
19 shows that the association of BMI with hypertension is stronger for South Asian  
20 populations, and public health measures to reduce population-level reduction in BMI  
21 would also help in lowering the burden of hypertension.

## 1 INTRODUCTION

2 Hypertension is one of the important preventable noncommunicable disease (NCD)  
3 risk factors for premature death and disability.<sup>1-3</sup> About one-third of world's adult  
4 population are hypertensive - according to recent reports.<sup>4,5</sup> The burden of  
5 hypertension is increasing particularly in the low- and middle-income countries  
6 (LMICs).<sup>5</sup> South Asia comprises of several LMICs and almost one-quarter of the  
7 world's population lives in South Asia. Therefore, a greater understanding of the  
8 burden of hypertension in this region is required to develop public health  
9 interventions to control it.

10 There has been a well-established association between adiposity and hypertension  
11 in developed settings,<sup>6-8</sup> but whether such association is heterogeneous for South  
12 Asian population is not well-known. Assessing association between body mass index  
13 (BMI) and hypertension has important public health implications in South Asian  
14 countries, where the burden of hypertension is high and obesity is increasing at the  
15 population level.<sup>9-11</sup> In addition, looking at the association in subgroups defined by  
16 sex, age, urbanicity, and socioeconomic status is crucial to understand how  
17 consistent the association between BMI and hypertension is across different groups.  
18 There is no study, to the best of our knowledge, which looked at the association of  
19 BMI with hypertension across different groups in nationally-representative samples  
20 from South Asian countries.

21 In this study, we aim to examine the age-specific prevalence of hypertension in three  
22 South Asian countries, namely Bangladesh, India, and Nepal. We also systematically  
23 assess the association between overweight-obesity and hypertension using different  
24 cut-offs, and how the association between BMI and hypertension varies across a  
25 wide variety of subgroups of population.

26

## 1 **METHODS**

### 2 **Study design and data sources**

3 This study is based on three South Asian countries, namely Bangladesh, India, and  
4 Nepal. Recent Demographic and Health Survey (DHS) data for these countries had  
5 information on both blood pressure and anthropometry for adult population.  
6 DHS are periodical nationally-representative household surveys which provide data  
7 for a wide range of variables on population, health, and nutrition. These surveys  
8 usually are conducted by a national implementing agency with technical assistances  
9 provided by the DHS program. Surveys are based on two-stage stratified sampling of  
10 households – firstly, sampling census enumeration areas are selected using  
11 probability proportional to size (PPS) sampling technique through statistics provided  
12 by the respective national statistical office, and secondly, households are selected  
13 through systematic random sampling from the complete listing of households within  
14 a selected enumeration area. From these selected households, subsamples of  
15 eligible participants are additionally selected for biomarker testing, which includes  
16 height, weight, and blood pressure.<sup>12</sup>  
17 DHS surveys receive ethical approval both from the ICF Institutional Review Board  
18 and from a country-specific review board. Informed consent is taken from each  
19 participant for their participation in the survey and for anthropometric and blood  
20 pressure measurements. The DHS program authorises researchers to use relevant  
21 datasets for analysis upon submission of a brief research proposal. The data we  
22 received for this study were anonymized for protection of privacy, anonymity and  
23 confidentiality. More details on survey design, ethical approval, data availability can  
24 be found in the DHS program website [<https://dhsprogram.com/>].

1 We included those who had consented for measurement of blood pressure, height,  
2 and weight, as well as had valid information for those variables. DHS surveys have  
3 very high response rate, usually more than 90%. We used the household member  
4 record dataset which has one record for every household member, and includes  
5 variables for sociodemographic, height, weight and blood pressure measurement.

6

### 7 **Anthropometric measurement and BMI classification**

8 In the included DHS surveys, height and weight of the participants were measured  
9 by trained personnel using standardized instruments and procedures. BMI was then  
10 calculated by dividing body weight (kg) by squared height (m<sup>2</sup>). We classified  
11 participants based into four groups according to the conventional World Health  
12 Organization (WHO) classification system:<sup>13</sup> underweight (<18.5 kg/m<sup>2</sup>), normal  
13 weight (18.5-24.9 kg/m<sup>2</sup>), overweight (25.0-29.9 kg/m<sup>2</sup>), and obese (≥30.0 kg/m<sup>2</sup>).  
14 We also classified them according to the proposed cut-offs for South Asian  
15 population: underweight (<18.0 kg/m<sup>2</sup>), normal weight (18.0-22.9 kg/m<sup>2</sup>), overweight  
16 (23.0-27.4 kg/m<sup>2</sup>) and obese (≥27.5 kg/m<sup>2</sup>).<sup>14</sup>

17

### 18 **Blood pressure measurement and hypertension**

19 Blood pressure was measured for participants using a standard protocol.<sup>15</sup> In brief,  
20 three measurements were taken by trained health technicians, at seating position, at  
21 about 10 minutes intervals. The mean of the second and third measurement was  
22 used to record systolic blood pressure and diastolic blood pressure.

23 We defined hypertension based on the cut-offs provided by the Seventh Report of  
24 Joint National Committee on Prevention, Detection, Evaluation, and Treatment of  
25 High Blood Pressure (JNC7) guideline 2003<sup>16</sup> and also the 2017 American College

1 of Cardiology/American Heart Association (2017 ACC/AHA) Guideline for the  
2 Prevention, Detection, Evaluation, and Management of High Blood Pressure in  
3 Adults.<sup>17</sup> According to the JNC7, an individual was categorised as hypertensive if  
4 they had systolic blood pressure  $\geq 140$  mmHg or diastolic blood pressure  $\geq 90$  mmHg  
5 or reported about antihypertensive medication use during the survey. According to  
6 the 2017 ACC/AHA, an individual was categorised as hypertensive if they had  
7 systolic blood pressure  $\geq 130$  mmHg or diastolic blood pressure  $\geq 80$  mmHg or  
8 reported about antihypertensive medication use during the survey.

9

#### 10 **Other covariates**

11 DHS collected information on wide range variables from the selected households  
12 and the respondents from those households using face-to-face interview conducted  
13 by trained personnel. DHS collected information on socioeconomic factors like area  
14 of residence and household's wealth index. Place of residence (rural and urban) was  
15 defined according to country-specific definitions. For household's wealth index, each  
16 national implementing agency constructed a country-specific index using principal  
17 components analysis from data on household assets including durable goods (i.e.  
18 bicycles, televisions etc.) and dwelling characteristics (i.e. sanitation, source of  
19 drinking water and construction material of house etc.).<sup>12</sup> This wealth index was then  
20 categorized into five groups (i.e. poorest, poorer, middle, richer, and richest) based  
21 on the quintile distribution of the sample.

## 1 **Statistical analyses**

2 All analyses were conducted following the instructions in the DHS guide to  
3 analysis.<sup>18</sup> All analyses were performed using Stata v15.1 (Statacorp, College  
4 Station, TX, USA). Considering the two-stage stratified cluster sampling in DHS, we  
5 applied Stata's survey estimation procedures ("svy" command) for estimations.<sup>19</sup>  
6 We looked at the descriptive statistics by sex on sociodemographic, anthropometric,  
7 and blood pressure variables using proportions for categorical variables and mean  
8 and standard deviation (SD) for continuous variables. We used sampling weights  
9 given in each DHS dataset in order to get nationally-representative estimates. 95%  
10 confidence intervals (CIs) for prevalence estimates were calculated using a logit  
11 transform of the estimate.

12 To examine the association between BMI and hypertension, we used multiple logistic  
13 regressions, separately for each included country. We also estimated the trend by  
14 estimating the odds ratios (ORs) with 95% confidence intervals (CIs) of hypertension  
15 for each 5 kg/m<sup>2</sup> increase in BMI. All these analyses were adjusted for age, sex, area  
16 of residence, household's highest education level, and household's wealth index, as  
17 appropriate. We then examined the trend in subgroups of individuals defined by  
18 various characteristics.

## 1 RESULTS

2 A total of 821 040 men and women from Bangladesh, India, and Nepal were  
3 included in this study. Table 1 shows that sociodemographic characteristics for three  
4 study population, by sex. Study populations varied widely for age – mean age for  
5 participants from Bangladesh was 51 years whereas the mean ages for participants  
6 from other two countries were much lower (India: 30 years and Nepal: 38 years).  
7 Almost two-thirds of the participants were from rural areas in Bangladesh and India,  
8 but Nepal had more participants from urban areas. Male participants were more  
9 likely to be educated than female participants in all countries, and India had higher  
10 proportions of men and women educated to secondary or higher level. Wealth index  
11 distributions were similar between men and women, and also among countries  
12 (Table 1).

13 Table 2 shows the distribution of anthropometric and blood pressure measurements  
14 for the study populations. On average, females had slightly higher BMI than males.  
15 According to both the WHO classification and South Asian classification systems,  
16 more women were overweight and obese in all three countries. In Bangladesh,  
17 women had higher systolic (mean 121.0 vs 116.2 mmHg) and diastolic (mean 79.6  
18 vs 76.4 mmHg) blood pressure than men. In contrary, men had higher mean blood  
19 pressure than women in India (systolic: 121.8 vs 115.2 mmHg; diastolic: 79.9 vs 78.1  
20 mmHg) and Nepal (systolic: 120.0 vs. 112.4 mmHg; diastolic 79.0 vs. 76.4 mmHg)  
21 (Table 2).

22 Overall, Bangladesh had higher prevalence of hypertension (both overall and by sex)  
23 than India and Nepal, but it is important to remember that Bangladesh had older  
24 study participants than the other two. When we looked at the age-specific prevalence  
25 of hypertension, there was a sharp increase in prevalence of hypertension by age



1 (Figure 1). The overall prevalence for hypertension among participants aged 35-44  
2 years were 17.4%, 20%, and 22.5% for Bangladesh, India, and Nepal, respectively.  
3 For age groups 45-54 years, the prevalence increased to 25% in Bangladesh, 28.6%  
4 in India, and 30% in Nepal. For all age groups, men had higher prevalence of  
5 hypertension than women in India and Nepal, but not in Bangladesh. When we used  
6 the 2017 ACC/AHA guidelines to define hypertension, the prevalence estimates, as  
7 expected, increased significantly for all age groups in all three countries  
8 (Supplementary Figure S1).

9 After adjustment for five sociodemographic factors including age, sex, area of  
10 residence, wealth index, and highest educational attainment, being overweight and  
11 obese individuals, independent of classification system, had higher odds of having  
12 hypertension when compared to normal weight individuals (Table 3). Overweight  
13 people had almost two-fold increase in the odds of hypertension, whereas obese  
14 people had more than three-fold higher odds of hypertension. For each 5 kg/m<sup>2</sup>  
15 increase in BMI, the ORs for hypertension were 1.79 (95% CI: 1.65-1.93), 1.59 (95%  
16 CI: 1.58-1.61), and 2.03 (95% CI: 1.90-2.16) in Bangladesh, India, and Nepal,  
17 respectively. We found similar associations between BMI and hypertension for all  
18 three countries when we used the AHA 2017 guidelines for defining hypertension  
19 (Supplementary Table S1).

20 To assess any further potential for effect modification by other factors, the OR per 5  
21 kg/m<sup>2</sup> was compared across subgroups of various individual characteristics,  
22 including sex, area of residence, age group, highest educational attainment, and  
23 household's wealth index (Figure 2). Weak evidence of heterogeneity in the  
24 association between BMI and hypertension was found by sex (higher magnitude in

1 males than females) in India and Nepal. For other characteristics, no significant  
2 heterogeneity was observed by subgroups consistently in three study populations.

3

4

## 5 **DISCUSSION**

6 This study involving more than 800 000 men and women from recent nationally-  
7 representative cross-sectional studies in three South Asian countries showed high  
8 prevalence of hypertension, particularly with increasing age. There were significant  
9 associations between overweight-obesity and hypertension, irrespective of cut-offs  
10 for defining overweight-obesity as well as hypertension. The associations between  
11 BMI and hypertension were consistent across various subgroups defined by sex,  
12 age, urbanicity, educational attainment and household's wealth index, implying the  
13 robustness of such association.

14 Our study showed that almost one in every five adults aged 35 years and above in  
15 Bangladesh, India, and Nepal had hypertension. A recent systematic review<sup>11</sup>  
16 showed considerable differences in prevalence estimates of hypertension in South  
17 Asian countries, but it did not consider the effects of differential age structure in the  
18 included studies. When we looked at the age-specific prevalence of hypertension,  
19 the country-specific prevalence estimates were almost similar. We found higher  
20 prevalence of hypertension among men than among women in India and Nepal, but  
21 not in Bangladesh. However, previous studies from this region mostly found the  
22 prevalence of hypertension was higher among men than among women.<sup>20–24</sup>  
23 Systematic analysis of population-based studies from 90 countries showed that the  
24 age-standardized prevalence of hypertension between 2000 and 2010 decreased by  
25 2.6% in developed countries, while in LMICs it increased by 7.7% during the same

1 period.<sup>5</sup> The high prevalence of hypertension in these three counties could be due to  
2 adoption of unhealthy lifestyles including intake of energy-dense foods, sedentary  
3 lifestyles, and rising level of obesity in the population.<sup>5,10,20,24</sup>  
4 Positive associations between BMI and hypertension have been well reported in  
5 studies conducted among different ethnic groups.<sup>6–8,25–28</sup> However, previous studies  
6 found that Asian populations had a much stronger association between BMI and  
7 blood pressure.<sup>26,27</sup> Our study adds to the evidence suggesting that there are ethnic  
8 differences in the strength of the association between BMI and hypertension. South  
9 Asian populations may be at greater risk of developing hypertension with increasing  
10 BMI than any other ethnic groups.<sup>28</sup> BMI has been found to be associated with  
11 hypertension, diabetes, and other NCDs in South Asian populations, at a much lower  
12 threshold level than the level for other populations.<sup>20,21,29</sup> The possible reasons for  
13 such differences could be genetic and metabolic variations, as well as clustering of  
14 environmental, dietary, and social factors associated with hypertension.<sup>9,27–29</sup>  
15 Previous studies looking at the relationship between adiposity and hypertension in  
16 this population were heterogeneous in terms of definitions used for overweight and  
17 obesity.<sup>11,21–23</sup> We looked at the association using both WHO and South Asian cut-  
18 offs and also for each 5 kg/m<sup>2</sup> increase in BMI. Our findings on the association  
19 between BMI and hypertension are consistent with previous literature.<sup>6–8</sup>  
20 Additionally, we were able to show that this association is consistent across a wide  
21 range of subgroups defined by various characteristics. This means that the  
22 association between BMI and hypertension is more likely to be biological rather than  
23 environmental.  
24 Since BMI is log-linearly associated with hypertension, any amount of reduction in  
25 BMI at population level can reduce the burden of hypertension at a large scale. Early

1 diagnosis and treatment of hypertension is crucial for reducing NDC burden in South  
2 Asian countries,<sup>23</sup> but given the robust and linear association between BMI and  
3 hypertension, primary prevention through reducing BMI would have much greater  
4 effect on reduction of cardiovascular morbidity and mortality. Previous studies found  
5 that awareness about high blood pressure and use of antihypertensive medication is  
6 low in this region.<sup>22,23,30</sup> Also, the health systems are not well-prepared to manage  
7 the large burden of NDCs.<sup>31,32</sup> Therefore, the policy makers should focus mainly on  
8 reduction of BMI at population level as one of the most important primary prevention  
9 strategies.

10 This study was limited by the use of cross-sectional data. There are possibilities of  
11 reverse causation; and we cannot establish a causal association between BMI and  
12 hypertension, or whether BMI is an independent risk factor of hypertension. We did  
13 not have dietary and lifestyle variables which could be potential mediators or could  
14 confound the observed associations. However, to the best of our knowledge, our  
15 study is the first to look at the association between BMI and hypertension in various  
16 subgroups of population. Taking advantage of the large sample size of our study, we  
17 were able to show that the associations of BMI with hypertension were robust across  
18 various socioeconomic subgroups. We also did several additional analyses using  
19 different cut-offs for defining both overweight-obesity and hypertension.

20 In conclusion, the age-specific prevalence of hypertension is very high among men  
21 and women in Bangladesh, India, and Nepal. The associations of BMI with  
22 hypertension are positive and robust across various subgroups of population defined  
23 by socioeconomic groups. Public health interventions targeting to reduce BMI at  
24 population level would have larger effects on reducing the burden of hypertension in  
25 South Asia.

1 **ACKNOWLEDGEMENTS**

2 The authors thank the participants of Demographic and Health Surveys used in this  
3 study from Bangladesh, India, and Nepal. We would also like to thank the DHS  
4 Program to authorize us to use the data.

5

6

7 **CONFLICT OF INTEREST**

8 None declared

9

10 **FUNDING**

11 This work was not supported by any funding

12

13 **AUTHOR CONTRIBUTIONS**

14 Conception and design: FH, MS, GA, and AC

15 Data collection and management: FH, MS, and GA

16 Data analysis: FH, MS, GA

17 Interpretation of the results: All authors

18 Drafting of the article: FH and MS

19 Critical revision of the article for important intellectual content: All authors

20 Final approval of the article: All authors

## 1 **SUMMARY TABLE**

### 2 **What is known?**

- 3 • In many South Asian countries, there have been increasing trends of obesity  
4 and hypertension.
- 5 • Body mass index is positively associated with hypertension, but whether such  
6 association is consistent across socioeconomic subgroups is not clear.

### 7 **What this study adds?**

- 8 • Almost one in five men and women aged 35 years and above in Bangladesh,  
9 India, and Nepal had hypertension.
- 10 • There were significant associations between overweight-obesity and  
11 hypertension, irrespective of cut-offs for defining overweight-obesity as well as  
12 hypertension.
- 13 • The associations between BMI and hypertension were consistent across  
14 various subgroups defined by sex, age, urbanicity, educational attainment and  
15 household's wealth index.

## 1 REFERENCES

- 2 1 GBD 2015 Risk Factors Collaborators. Global, regional, and national  
3 comparative risk assessment of 79 behavioural, environmental and  
4 occupational, and metabolic risks or clusters of risks, 1990-2015: a systematic  
5 analysis for the Global Burden of Disease Study 2015. *Lancet (London,*  
6 *England)* 2016; **388**: 1659–1724.
- 7 2 Lawes CMM, Vander Hoorn S, Rodgers A. Global burden of blood-pressure-  
8 related disease, 2001. *Lancet (London, England)* 2008; **371**: 1513–1518.
- 9 3 Kearney PM, Whelton M, Reynolds K, Muntner P, Whelton PK, He J. Global  
10 burden of hypertension: analysis of worldwide data. *Lancet (London, England)*  
11 2005; **365**: 217–223.
- 12 4 Zhou B, Bentham J, Di Cesare M, Bixby H, Danaei G, Cowan MJ *et al.*  
13 Worldwide trends in blood pressure from 1975 to 2015: a pooled analysis of  
14 1479 population-based measurement studies with 19.1 million participants.  
15 *Lancet* 2017; **389**: 37–55.
- 16 5 Mills KT, Bundy JD, Kelly TN, Reed JE, Kearney PM, Reynolds K *et al.* Global  
17 Disparities of Hypertension Prevalence and Control: A Systematic Analysis of  
18 Population-Based Studies From 90 Countries. *Circulation* 2016; **134**: 441–450.
- 19 6 Gelber RP, Gaziano JM, Manson JE, Buring JE, Sesso HD. A prospective  
20 study of body mass index and the risk of developing hypertension in men. *Am*  
21 *J Hypertens* 2007; **20**: 370–377.
- 22 7 Droyvold WB, Midthjell K, Nilsen TIL, Holmen J. Change in body mass index  
23 and its impact on blood pressure: a prospective population study. *Int J Obes*  
24 *(Lond)* 2005; **29**: 650–655.
- 25 8 Shuger SL, Sui X, Church TS, Meriwether RA, Blair SN. Body mass index as a

- 1 predictor of hypertension incidence among initially healthy normotensive  
2 women. *Am J Hypertens* 2008; **21**: 613–619.
- 3 9 Misra A, Jayawardena R, Anoop S. Obesity in South Asia: Phenotype,  
4 Morbidities, and Mitigation. *Curr Obes Rep* 2019; **8**: 43–52.
- 5 10 Ramachandran A, Snehalatha C. Rising burden of obesity in Asia. *J Obes*  
6 2010; **2010**: 868573.
- 7 11 Neupane D, McLachlan CS, Sharma R, Gyawali B, Khanal V, Mishra SR *et al*.  
8 Prevalence of hypertension in member countries of South Asian Association  
9 for Regional Cooperation (SAARC): systematic review and meta-analysis.  
10 *Medicine (Baltimore)* 2014; **93**: e74–e74.
- 11 12 The DHS Program. DHS Overview. 2019.[https://dhsprogram.com/What-We-](https://dhsprogram.com/What-We-Do/Survey-Types/DHS.cfm)  
12 [Do/Survey-Types/DHS.cfm](https://dhsprogram.com/What-We-Do/Survey-Types/DHS.cfm) (accessed 3 Apr2019).
- 13 13 Executive summary of the clinical guidelines on the identification, evaluation,  
14 and treatment of overweight and obesity in adults. *Arch Intern Med* 1998; **158**:  
15 1855–1867.
- 16 14 Stegenga H, Haines A, Jones K, Wilding J. Identification, assessment, and  
17 management of overweight and obesity: summary of updated NICE guidance.  
18 *BMJ Br Med J* 2014; **349**: g6608.
- 19 15 ICF International / Demographic and Health Surveys. Biomarker Field Manual:  
20 Demographic and Health Survey Methodology. Maryland, USA,  
21 2012[https://www.dhsprogram.com/publications/publication-dhsm7-dhs-](https://www.dhsprogram.com/publications/publication-dhsm7-dhs-questionnaires-and-manuals.cfm)  
22 [questionnaires-and-manuals.cfm](https://www.dhsprogram.com/publications/publication-dhsm7-dhs-questionnaires-and-manuals.cfm).
- 23 16 Chobanian A V, Bakris GL, Black HR, Cushman WC, Green LA, Izzo JLJ *et al*.  
24 The Seventh Report of the Joint National Committee on Prevention, Detection,  
25 Evaluation, and Treatment of High Blood Pressure: the JNC 7 report. *JAMA*



- 1           2003; **289**: 2560–2572.
- 2   17   Whelton PK, Carey RM, Aronow WS, Casey DEJ, Collins KJ, Dennison  
3           Himmelfarb C *et al.* 2017  
4           ACC/AHA/AAPA/ABC/ACPM/AGS/APhA/ASH/ASPC/NMA/PCNA Guideline  
5           for the Prevention, Detection, Evaluation, and Management of High Blood  
6           Pressure in Adults: Executive Summary: A Report of the American College of  
7           Cardiology/American Heart Association Task Force on Clinical Practice  
8           Guidelines. *Hypertens (Dallas, Tex 1979)* 2018; **71**: 1269–1324.
- 9   18   DHS Program. Using datasets for analysis.  
10           <https://dhsprogram.com/data/Using-Datasets-for-Analysis.cfm> (accessed 14  
11           Nov2017).
- 12   19   StataCorp. svy estimation - Estimation commands for survey data.  
13           <https://www.stata.com/manuals13/svysvyestimation.pdf> (accessed 3 Apr2019).
- 14   20   Gupta R, Gaur K, S Ram CV. Emerging trends in hypertension epidemiology in  
15           India. *J Hum Hypertens* 2018. doi:10.1038/s41371-018-0117-3.
- 16   21   Geldsetzer P, Manne-Goehler J, Theilmann M, Davies JI, Awasthi A, Vollmer  
17           S *et al.* Diabetes and Hypertension in India: A Nationally Representative Study  
18           of 1.3 Million AdultsDiabetes and Hypertension in IndiaDiabetes and  
19           Hypertension in India. *JAMA Intern Med* 2018; **178**: 363–372.
- 20   22   Roy A, Praveen PA, Amarchand R, Ramakrishnan L, Gupta R, Kondal D *et al.*  
21           Changes in hypertension prevalence, awareness, treatment and control rates  
22           over 20 years in National Capital Region of India: results from a repeat cross-  
23           sectional study. *BMJ Open* 2017; **7**. doi:10.1136/bmjopen-2016-015639.
- 24   23   Mehata S, Shrestha N, Mehta R, Vaidya A, Rawal LB, Bhattarai N *et al.*  
25           Prevalence, awareness, treatment and control of hypertension in Nepal: data

- 1 from nationally representative population-based cross-sectional study. *J*  
2 *Hypertens* 2018; **36**: 1680–1688.
- 3 24 Islam AKMM, Majumder AAS. Hypertension in Bangladesh: a review. *Indian*  
4 *Heart J* 2012; **64**: 319–323.
- 5 25 Cassano PA, Segal MR, Vokonas PS, Weiss ST. Body fat distribution, blood  
6 pressure, and hypertension. A prospective cohort study of men in the  
7 normative aging study. *Ann Epidemiol* 1990; **1**: 33–48.
- 8 26 Hu FB, Wang B, Chen C, Jin Y, Yang J, Stampfer MJ *et al*. Body mass index  
9 and cardiovascular risk factors in a rural Chinese population. *Am J Epidemiol*  
10 2000; **151**: 88–97.
- 11 27 Linderman GC, Lu J, Lu Y, Sun X, Xu W, Nasir K *et al*. Association of Body  
12 Mass Index With Blood Pressure Among 1.7 Million Chinese Adults. *JAMA*  
13 *Netw open* 2018; **1**: e181271.
- 14 28 McKeigue PM, Shah B, Marmot MG. Relation of central obesity and insulin  
15 resistance with high diabetes prevalence and cardiovascular risk in South  
16 Asians. *Lancet (London, England)* 1991; **337**: 382–386.
- 17 29 Hills AP, Arena R, Khunti K, Yajnik CS, Jayawardena R, Henry CJ *et al*.  
18 Epidemiology and determinants of type 2 diabetes in south Asia. *lancet*  
19 *Diabetes Endocrinol* 2018; **6**: 966–978.
- 20 30 Rahman M, Williams G, Al Mamun A. Gender differences in hypertension  
21 awareness, antihypertensive use and blood pressure control in Bangladeshi  
22 adults: findings from a national cross-sectional survey. *J Heal Popul Nutr* 2017;  
23 **36**. doi:10.1186/s41043-017-0101-5.
- 24 31 Sengupta A, Zaidi S, Sundararaman T, Onta S, Weerasinghe MC. Tackling the  
25 primary care access challenge in South Asia. *BMJ* 2018; **363**: k4878.

- 1 32 Zaidi S, Saligram P, Ahmed S, Sonderp E, Sheikh K. Expanding access to
- 2 healthcare in South Asia. *BMJ* 2017; **357**: j1645.
- 3

1 **FIGURE LEGENDS**

2

3 **Figure 1:** Age-specific prevalence of hypertension in three study populations, overall

4 and by sex

5

6 **Figure 2:** Odds ratios (ORs) with 95% confidence intervals (CIs) of hypertension per

7 5 kg/m<sup>2</sup> increase in body mass index (BMI), by various characteristics

8 Logistic regression models were adjusted for age, sex, area of residence, wealth

9 index and highest educational attainment, as appropriate.

10

1 **Table 1:** Sociodemographic characteristics of three study populations, by sex

|                                           | Bangladesh  |             | India        |               | Nepal       |             |
|-------------------------------------------|-------------|-------------|--------------|---------------|-------------|-------------|
|                                           | Male        | Female      | Male         | Female        | Male        | Female      |
| Number of participants                    | 3798        | 3837        | 109527       | 689131        | 6114        | 8633        |
| Age in years, mean (SD)                   | 51.7 (12.9) | 50.4 (12.5) | 31.7 (11.1)  | 29.8 (9.8)    | 40.1 (18.2) | 36.9 (16.9) |
| Type of place of residence, n (%)         |             |             |              |               |             |             |
| Urban                                     | 1253 (33.0) | 1254 (32.7) | 34137 (31.2) | 199227 (28.9) | 3884 (63.5) | 5459 (63.2) |
| Rural                                     | 2545 (67.0) | 2583 (67.3) | 75390 (68.8) | 489904 (71.1) | 2230 (36.5) | 3174 (36.8) |
| Highest educational level attained, n (%) |             |             |              |               |             |             |
| No education, preschool                   | 1330 (35.0) | 2112 (55.0) | 13874 (12.7) | 186695 (27.1) | 1428 (23.4) | 4089 (47.4) |
| Primary                                   | 1076 (28.3) | 1035 (27.0) | 14250 (13.0) | 93170 (13.5)  | 1278 (20.9) | 1141 (13.2) |
| Secondary                                 | 890 (23.4)  | 538 (14.0)  | 64081 (58.5) | 330514 (48.0) | 2398 (39.2) | 2440 (28.3) |
| Higher                                    | 502 (13.2)  | 152 (4.0)   | 17064 (15.6) | 77464 (11.2)  | 1005 (16.4) | 959 (11.1)  |
| Wealth index, n (%)                       |             |             |              |               |             |             |
| Poorest                                   | 681 (17.9)  | 664 (17.3)  | 18302 (16.7) | 132389 (19.2) | 1293 (21.1) | 1917 (22.2) |
| Poorer                                    | 702 (18.5)  | 686 (17.9)  | 22874 (20.9) | 147995 (21.5) | 1241 (20.3) | 1792 (20.8) |
| Middle                                    | 732 (19.3)  | 750 (19.5)  | 23782 (21.7) | 145007 (21.0) | 1185 (19.4) | 1754 (20.3) |
| Richer                                    | 769 (20.2)  | 816 (21.3)  | 22620 (20.7) | 135960 (19.7) | 1276 (20.9) | 1738 (20.1) |
| Richest                                   | 914 (24.1)  | 921 (24.0)  | 21949 (20.0) | 127780 (18.5) | 1119 (18.3) | 1432 (16.6) |

2  
3  
4

1 **Table 2:** Distribution of anthropometric and blood pressure measurements among the three study populations, by sex

|                                                    | Bangladesh   |              | India         |               | Nepal        |              |
|----------------------------------------------------|--------------|--------------|---------------|---------------|--------------|--------------|
|                                                    | Male         | Female       | Male          | Female        | Male         | Female       |
| Weight in kg, mean (SD)                            | 54.2 (10.4)  | 48.0 (10.9)  | 58.3 (11.5)   | 50.3 (10.6)   | 57.2 (10.6)  | 50.1 (9.9)   |
| Height in cm, mean (SD)                            | 161.7 (6.5)  | 149.5 (5.9)  | 163.4 (7.4)   | 152.0 (6.1)   | 162.7 (6.5)  | 151.0 (6.0)  |
| BMI in kg/m <sup>2</sup> , mean (SD)               | 20.7 (3.4)   | 21.4 (4.5)   | 21.8 (3.9)    | 21.7 (4.2)    | 21.6 (3.5)   | 22.0 (4.0)   |
| BMI category (WHO cut-offs), n (%)                 |              |              |               |               |              |              |
| <18.5 kg/m <sup>2</sup>                            | 1060 (27.9)  | 1090 (28.4)  | 21035 (19.2)  | 151161 (21.9) | 1123 (18.4)  | 1596 (18.5)  |
| 18.5-24.9 kg/m <sup>2</sup>                        | 2328 (61.3)  | 2016 (52.5)  | 69208 (63.2)  | 411908 (59.8) | 4034 (66.0)  | 5316 (61.6)  |
| 25.0-29.9 kg/m <sup>2</sup>                        | 374 (9.8)    | 578 (15.1)   | 16342 (14.9)  | 96929 (14.1)  | 825 (13.5)   | 1366 (15.8)  |
| ≥30.0 kg/m <sup>2</sup>                            | 36 (0.9)     | 153 (4.0)    | 2942 (2.7)    | 29133 (4.2)   | 132 (2.2)    | 355 (4.1)    |
| BMI category (South Asian cut-offs), n (%)         |              |              |               |               |              |              |
| <18.0 kg/m <sup>2</sup>                            | 835 (22.0)   | 892 (23.2)   | 15892 (14.5)  | 117165 (17.0) | 808 (13.2)   | 1198 (13.9)  |
| 18.0-22.9 kg/m <sup>2</sup>                        | 2106 (55.5)  | 1721 (44.9)  | 57271 (52.3)  | 357864 (51.9) | 3523 (57.6)  | 4531 (52.5)  |
| 23.0-27.4 kg/m <sup>2</sup>                        | 714 (18.8)   | 885 (23.1)   | 28583 (26.1)  | 151733 (22.0) | 1403 (22.9)  | 2040 (23.6)  |
| ≥27.5 kg/m <sup>2</sup>                            | 143 (3.8)    | 339 (8.8)    | 7781 (7.1)    | 62369 (9.1)   | 380 (6.2)    | 864 (10.0)   |
| Systolic blood pressure in mmHg, mean (SD)         | 116.2 (19.2) | 121.0 (22.4) | 121.8 (13.6)  | 115.2 (15.1)  | 120.0 (18.6) | 112.4 (18.6) |
| Diastolic blood pressure in mmHg, mean (SD)        | 76.4 (11.6)  | 79.6 (11.9)  | 79.9 (10.5)   | 78.1 (18.1)   | 79.0 (11.9)  | 76.4 (11.1)  |
| Taking prescribed medicine to lower blood pressure |              |              |               |               |              |              |
| No                                                 | 3503 (92.3)  | 3256 (84.9)  | 106839 (97.5) | 667872 (96.9) | 5886 (96.3)  | 8328 (96.5)  |
| Yes                                                | 293 (7.7)    | 577 (15.1)   | 2686 (2.5)    | 21239 (3.1)   | 228 (3.7)    | 305 (3.5)    |

2

3

1 **Table 3:** Adjusted odds ratios (ORs) with 95% CI for hypertension by BMI

|                                              | Bangladesh   |                          | India        |                          | Nepal        |                          |
|----------------------------------------------|--------------|--------------------------|--------------|--------------------------|--------------|--------------------------|
|                                              | No. of cases | OR (95% CI) <sup>†</sup> | No. of cases | OR (95% CI) <sup>†</sup> | No. of cases | OR (95% CI) <sup>†</sup> |
| <b>BMI categories (WHO cut-offs)</b>         |              |                          |              |                          |              |                          |
| Underweight (<18.5 kg/m <sup>2</sup> )       | 383          | 0.57 (0.50-0.65)         | 12121        | 0.70 (0.69-0.72)         | 301          | 0.55 (0.48-0.63)         |
| Normal weight (18.5-25.0 kg/m <sup>2</sup> ) | 1110         | 1.00 (0.93-1.07)         | 55386        | 1.00 (0.99-1.01)         | 1519         | 1.00 (0.94-1.06)         |
| Overweight (25.0-29.9 kg/m <sup>2</sup> )    | 394          | 1.80 (1.57-2.07)         | 27738        | 1.99 (1.96-2.02)         | 757          | 2.46 (2.24-2.71)         |
| Obese (≥30.0 kg/m <sup>2</sup> )             | 108          | 2.72 (2.00-3.68)         | 10762        | 3.03 (2.96-3.11)         | 213          | 3.62 (2.97-4.41)         |
| <b>BMI categories (South Asian cut-offs)</b> |              |                          |              |                          |              |                          |
| Underweight (<18.0 kg/m <sup>2</sup> )       | 322          | 0.73 (0.63-0.83)         | 9221         | 0.79 (0.77-0.80)         | 233          | 0.65 (0.56-0.76)         |
| Normal weight (18.0-23.0 kg/m <sup>2</sup> ) | 820          | 1.00 (0.92-1.09)         | 40596        | 1.00 (0.99-1.01)         | 1145         | 1.00 (0.93-1.07)         |
| Overweight (23.0-27.0 kg/m <sup>2</sup> )    | 614          | 2.14 (1.93-2.38)         | 34799        | 1.76 (1.74-1.79)         | 911          | 2.03 (1.87-2.20)         |
| Obese (≥27.0 kg/m <sup>2</sup> )             | 239          | 2.99 (2.46-3.64)         | 21391        | 3.04 (2.99-3.10)         | 501          | 3.64 (3.19-4.16)         |
| <b>Trend (per 5 kg/m<sup>2</sup>)</b>        | 1995         | 1.79 (1.65-1.93)         | 106007       | 1.59 (1.58-1.61)         | 2790         | 2.03 (1.90-2.16)         |

2 <sup>†</sup> Logistic regression models were adjusted for age, sex, area of residence, wealth index and highest educational attainment

3

(A) Bangladesh

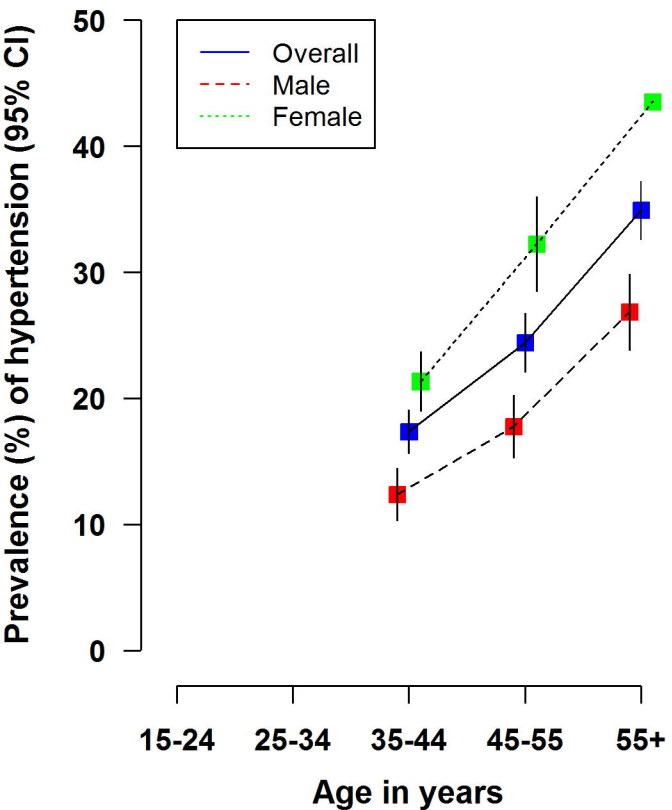

(B) India

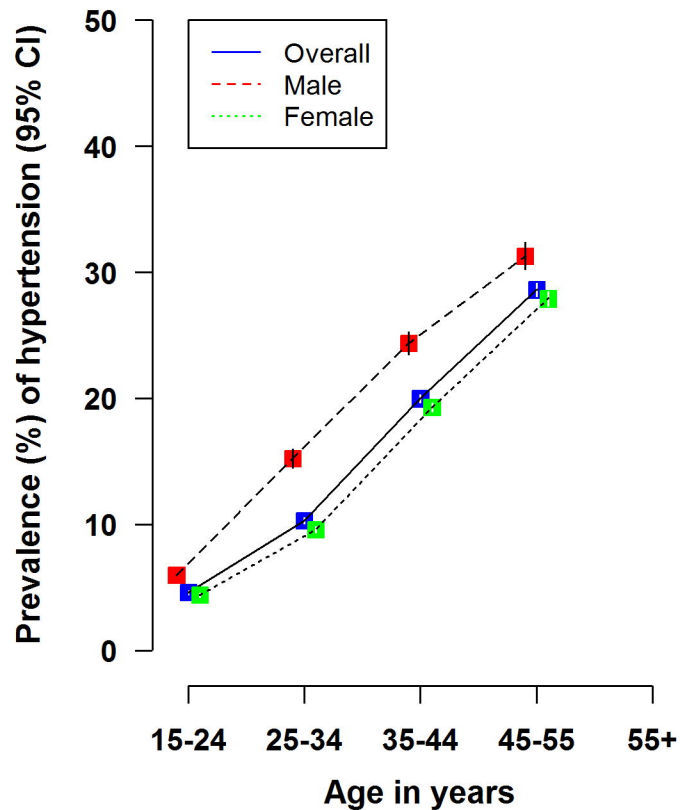

(C) Nepal

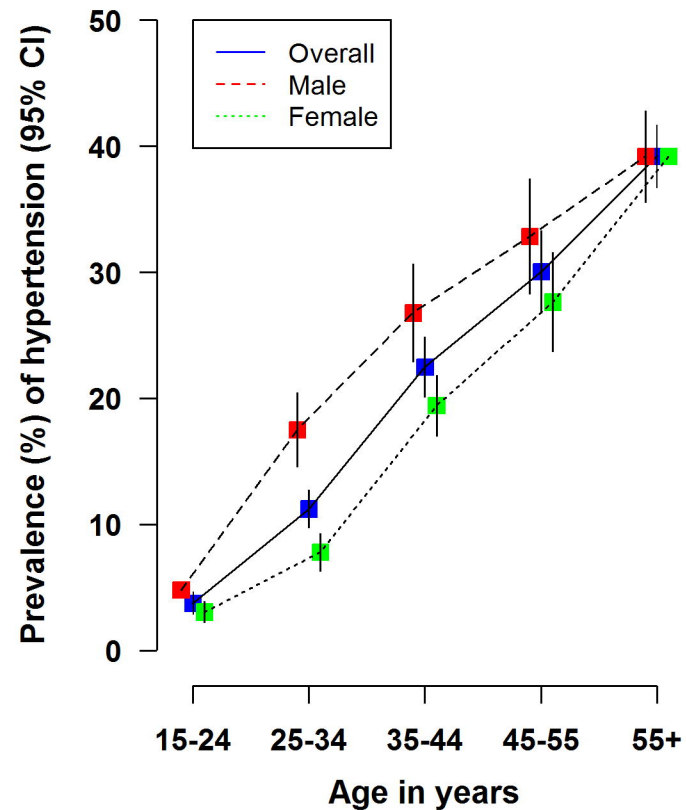



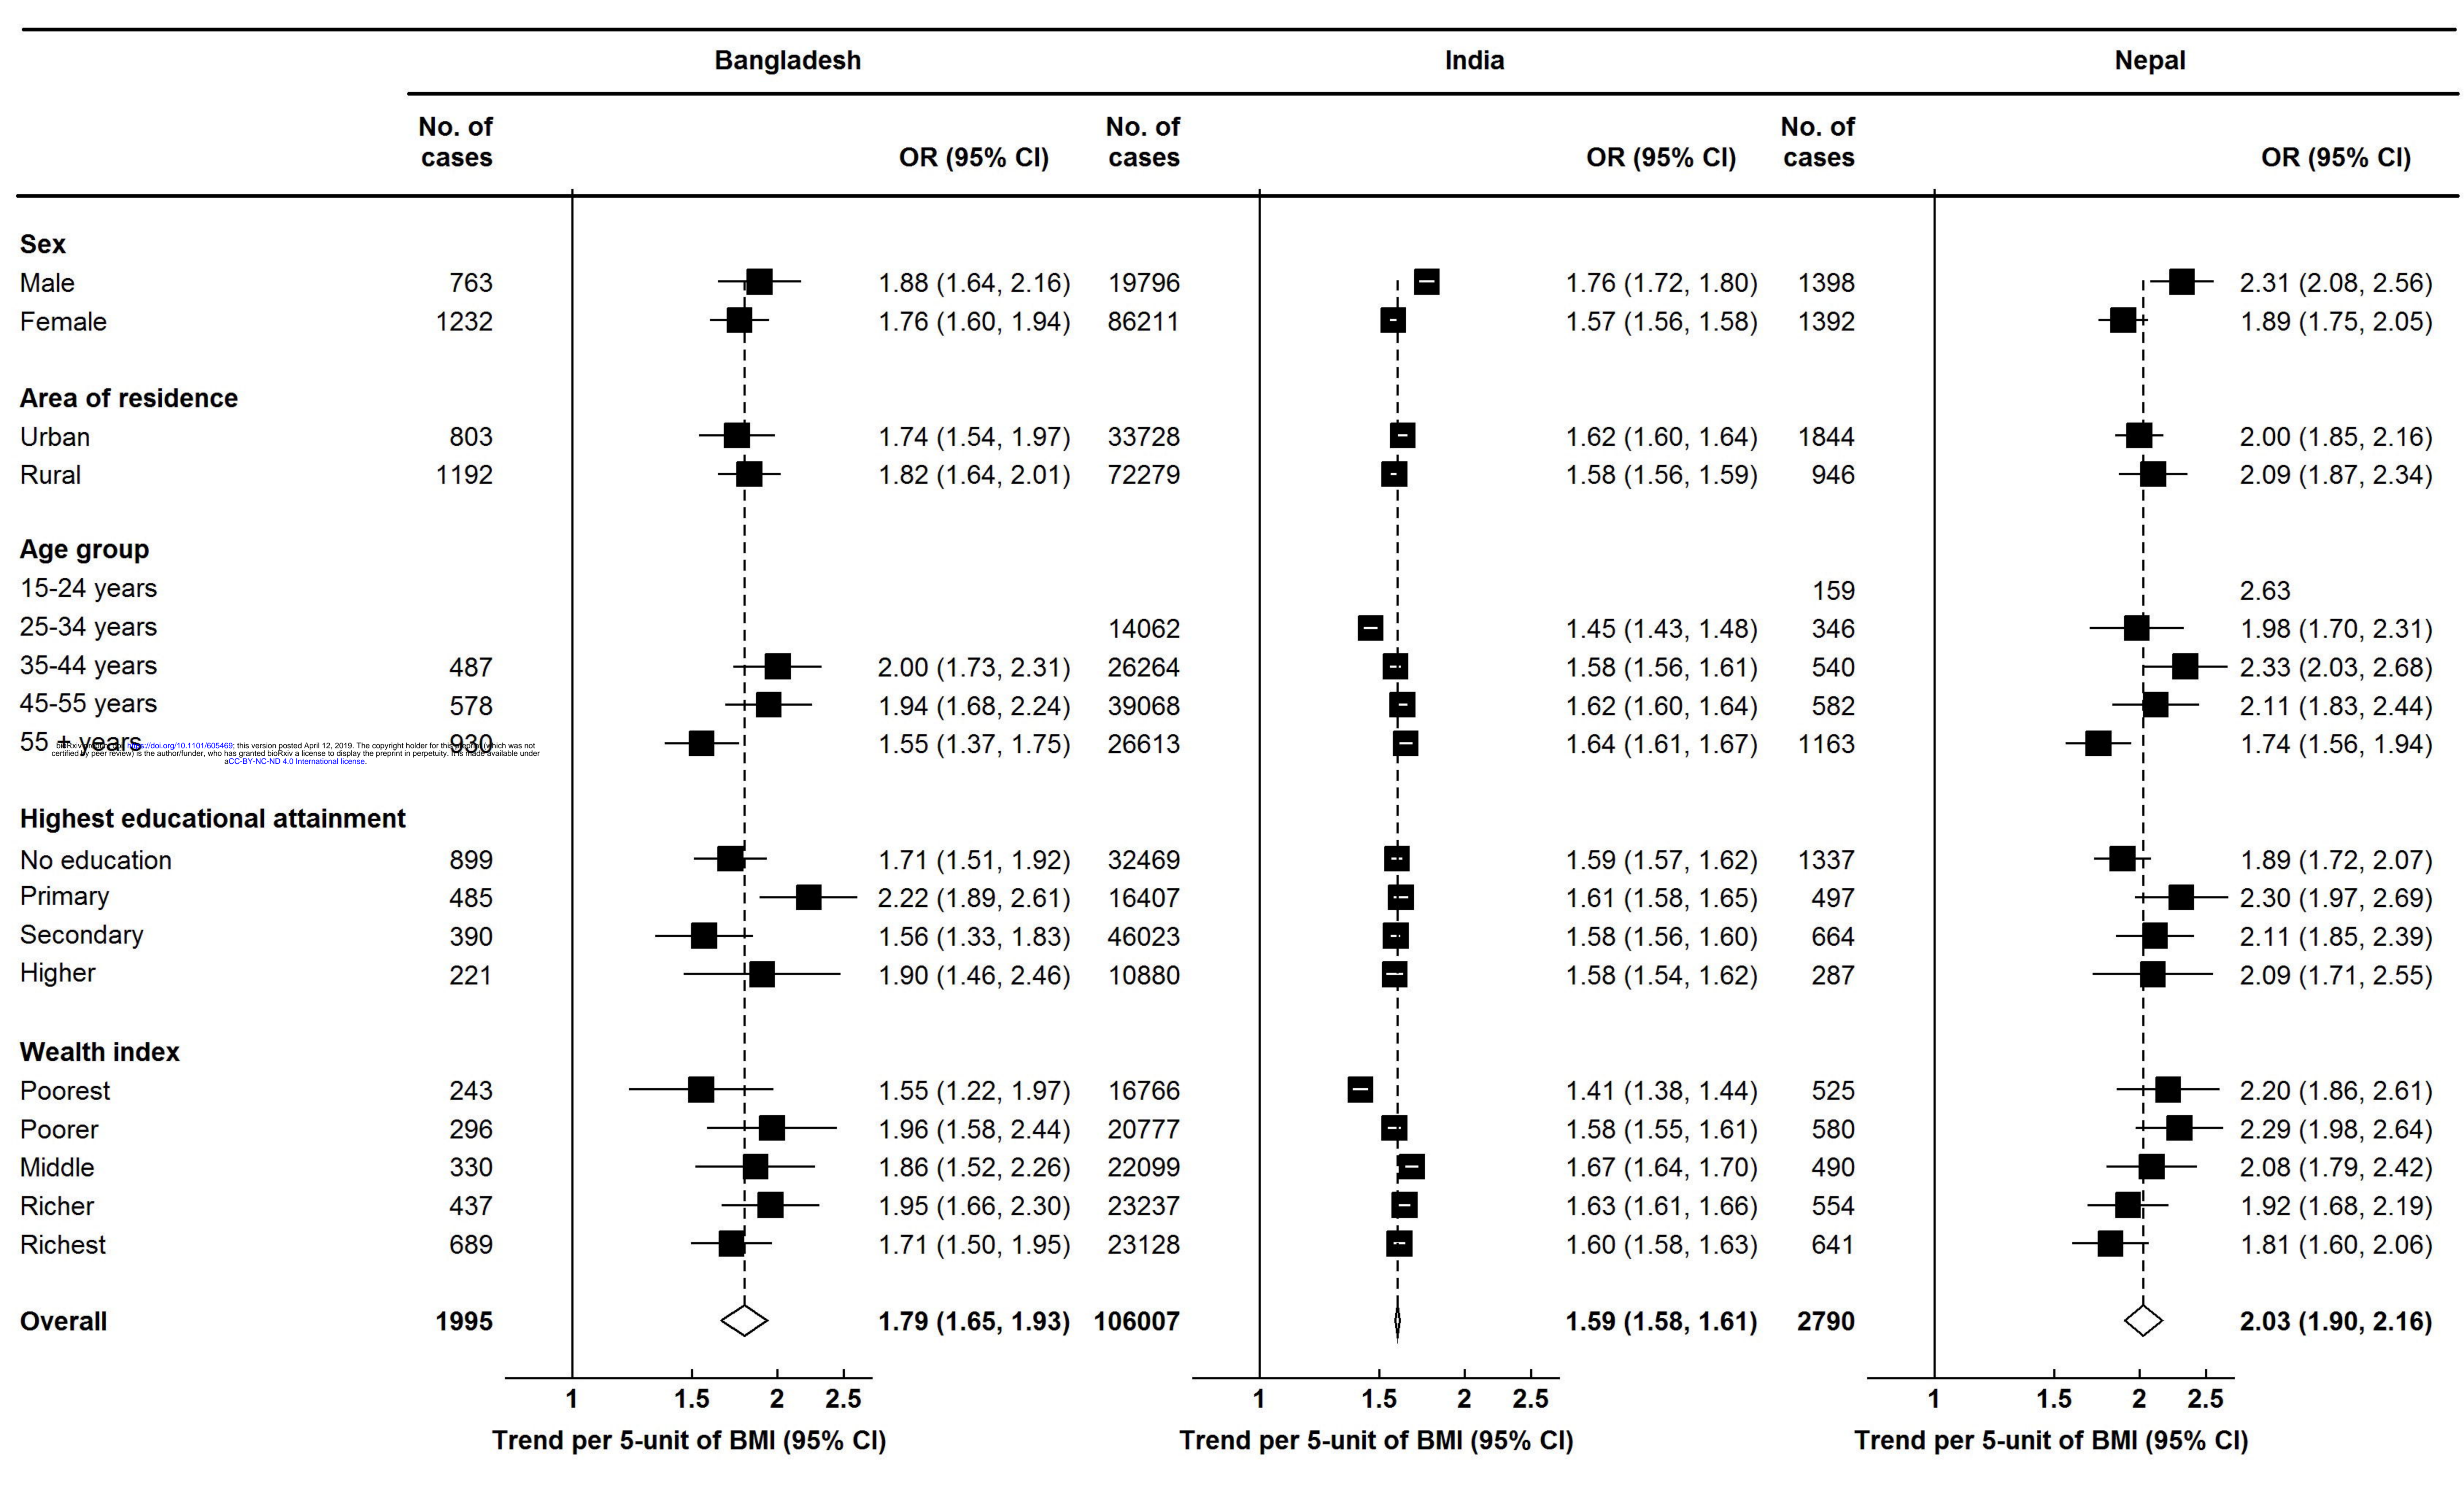

Source: https://biorxiv.org/content/biorxiv/early/2019/04/12/605469.full-text.pdf
